# Supplementary material for: Multi-pathway Protective Effects of MicroRNAs on Human Chondrocytes in an In Vitro Model of Osteoarthritis
Source: PubMed Central journal article supplement (PMC6716067; doi:10.1016/j.omtn.2019.07.011), 2019-07-26
Supplement: mmc1.pdf [file mmc1.pdf]

OMTN, Volume 17

## Supplemental Information

### **Multi-pathway Protective Effects of MicroRNAs on Human Chondrocytes in an *In Vitro* Model of Osteoarthritis**

**Rua Nader Al-Modawi, Jan E. Brinchmann, and Tommy A. Karlsen**

### **Supplementary 1: Shared proteins between the three miRNAs**

| <b>Common downregulated between miR-140-5p and miR140-3p</b> | <b>Common upregulated between miR-140-5p and miR140-3p</b> | <b>Common downregulated between miR-140-5p and miR146a</b> | <b>Common upregulated between miR-140-3p and miR146a</b> |
|--------------------------------------------------------------|------------------------------------------------------------|------------------------------------------------------------|----------------------------------------------------------|
| STA5A                                                        | STAT3                                                      | HCFC1                                                      | PCOC1                                                    |
| C1R                                                          | MEP50                                                      |                                                            |                                                          |
|                                                              | NUP93                                                      |                                                            |                                                          |

### **Supplementary 2: Taqman probes, miRNA mimics and antibodies**

| <b><u>Taqman Assays</u></b> |                                                                         |                                |                |
|-----------------------------|-------------------------------------------------------------------------|--------------------------------|----------------|
| <b>Official symbol</b>      | <b>Official full name</b>                                               | <b>Company</b>                 | <b>Cat no.</b> |
| IL6                         | Interleukin-6                                                           | Thermo<br>Fisher<br>Scientific | Hs00985639_m1  |
| IL8                         | Interleukin-8                                                           | Thermo<br>Fisher<br>Scientific | Hs00174103_m1  |
| IL1 $\beta$                 | Interleukin 1-beta                                                      | Thermo<br>Fisher<br>Scientific | Hs01555410_m1  |
| MMP13                       | Matrix metalloproteinase 13                                             | Thermo<br>Fisher<br>Scientific | Hs00233992_m1  |
| ADAMTS5                     | A disintegrin and metalloproteinase with thrombospondin type 1 motif, 5 | Thermo<br>Fisher<br>Scientific | Hs00199841_m1  |
| GAPDH                       | Glyceraldehyde-3-phosphate dehydrogenase                                | Thermo<br>Fisher<br>Scientific | Hs99999905_m1  |
| miR-140-5p                  | microRNA 140-5p                                                         | Thermo<br>Fisher<br>Scientific | 001187         |
| U18                         | U18 small nuclear RNA                                                   | Thermo<br>Fisher<br>Scientific | 001204         |
| miR140-3p                   | microRNA 140-3p                                                         | Thermo<br>Fisher<br>Scientific | 002234         |
| miR146a                     | microRNA 146a                                                           | Thermo<br>Fisher<br>Scientific | 00468          |
| GABARAP                     | Gamma-aminobutyric acid receptor-associated protein                     | Thermo<br>Fisher<br>Scientific | Hs01572686_m1  |
| C1R                         | Complement C1r subcomponent                                             | Thermo<br>Fisher<br>Scientific | Hs00354278_m1  |
| STAT5                       | Signal transducer and activator of transcription 5A                     | Thermo<br>Fisher<br>Scientific | Hs00559637_g1  |
| RALA                        | Ras-related protein Ral-A                                               | Thermo<br>Fisher               | Hs00800233_s1  |

|         |                                                            |                                |               |
|---------|------------------------------------------------------------|--------------------------------|---------------|
| DHCR24  | Delta(24)-sterol reductase                                 | Scientific<br>Thermo<br>Fisher | Hs00207388_m1 |
| LAMTOR5 | Ragulator complex protein<br>LAMTOR5                       | Scientific<br>Thermo<br>Fisher | Hs00246261_m1 |
| BROX    | BRO1 domain-containing protein                             | Scientific<br>Thermo<br>Fisher | Hs01013625_m1 |
| DDAH1   | N(G),N(G)-dimethylarginine<br>dimethylaminohydrolase 1     | Scientific<br>Thermo<br>Fisher | Hs00201707_m1 |
| RIPK2   | Receptor-interacting serine/threonine-<br>protein kinase 2 | Scientific<br>Thermo<br>Fisher | Hs01572686_m1 |
| STAT2   | Signal transducer and activator of<br>transcription 2      | Scientific<br>Thermo<br>Fisher | Hs01013115_g1 |
| TP5313  | Quinone oxidoreductase PIG3                                | Scientific<br>Thermo<br>Fisher | Hs00936519_m1 |

---

**microRNA mimics**

| <b>Name</b>                   |                 | <b>Company</b>                 | <b>Cat no.</b> |
|-------------------------------|-----------------|--------------------------------|----------------|
| Pre-negative control<br>no. 1 |                 | Thermo<br>Fisher               | AM17110        |
| Pre-miR-140-5p                | microRNA-140-5p | Scientific<br>Thermo<br>Fisher | PM10205        |
| Pre-miR-140-3p                | microRNA-140-3p | Scientific<br>Thermo<br>Fisher | PM12503        |
| Pre-miR-146a                  | microRNA-146a   | Scientific<br>Thermo<br>Fisher | PM10722        |

---

**Antibodies (western blot)**

| <b>Primary antibodies</b> | <b>Concentration</b> | <b>Company</b>    | <b>Cat.no</b> |
|---------------------------|----------------------|-------------------|---------------|
| Mouse anti-ACTB           | 1:1000               | Abcam             | ab8226        |
| Rabbit anti-IL8           | 1:1000               | Millipore         | AB1427        |
| Rabbit anti-IL6           | 1:1000               | Abcam             | Ab32530       |
| Mouse anti-TRAF6          | 1:1000               | Abcam             | Ab40675       |
| Rabbit anti-RALA          | 1:2000               | Abcam             | Ab126627      |
| Rabbit anti-GBRAP         | 1:1000               | Cell<br>signaling | # 13733       |
| Rabbit anti-RIPK2         | 1:1000               | Abcam             | Ab8428        |

|                      |         |                |         |
|----------------------|---------|----------------|---------|
| Rabbit anti-NFκB-P65 | 1:1600  | Abcam          | Ab16502 |
| Rabbit anti-LAMTORC  | 1:1000  | Cell signaling | #14633  |
| Rabbit anti-PDCD4    | 1:10000 | Abcam          | Ab80590 |

---

**Secondary antibodies**

|                        |                                                            |             |         |
|------------------------|------------------------------------------------------------|-------------|---------|
| Goat anti-Rabbit (HRP) | 1:5000<br>1:2000(when used with primary rabbit anti-PDCD4) | Vector labs | PI-1000 |
| Horse anti-Mouse (HRP) | 1:2000                                                     | Vector labs | PI-2000 |

---
